# Supplementary material for: Transparent organic/inorganic nanocomposites for tunable full-color upconversion
Source: Royal Society of Chemistry journal article supplement (doi:10.1039/c5tc01315a), 2015-01-01
Supplement: c5tc01315a1.pdf [file c5tc01315a1.pdf]

## **Electronic Supplementary Information**

### **Transparent organic/inorganic nanocomposite for tunable full-color upconversion**

Xiangwen Sang,<sup>a</sup> Weibo Chen,<sup>a</sup> Ping Chen,<sup>a</sup> Xiaofeng Liu<sup>\*a</sup> and Jianrong Qiu<sup>\*ab</sup>

<sup>a</sup> School of Materials Science and Engineering, Zhejiang University, Hangzhou, Zhejiang, 310027, China. E-mail: qjr@zju.edu.cn; xfliu@zju.edu.cn; Fax: +86 57188925079; Tel: +86 57188925079

<sup>b</sup> State Key Laboratory of Luminescent Materials and Devices and Guangdong Provincial Key Laboratory of Fiber Laser Materials and Applied Techniques, South China University of Technology, Guangzhou, Guangdong, 510640, China

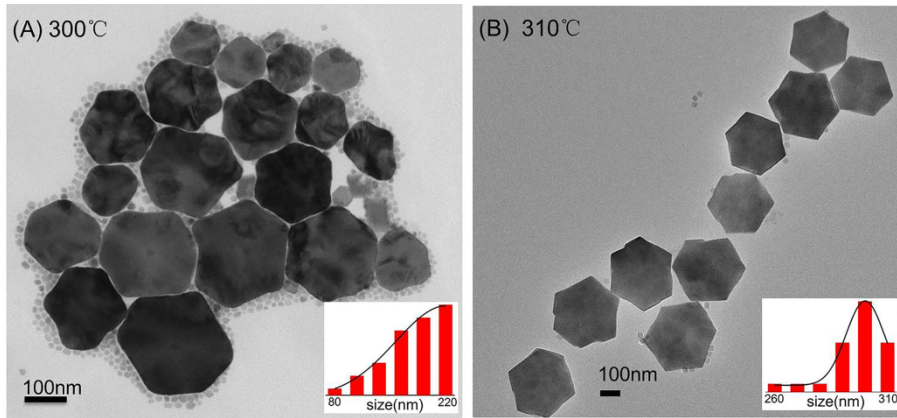

Fig. S1 Typical TEM images of NaYF<sub>4</sub>:20%Yb, 1%Er nanoparticles synthesized at two different temperatures. The corresponding size distributions are shown as insets in (A-B).

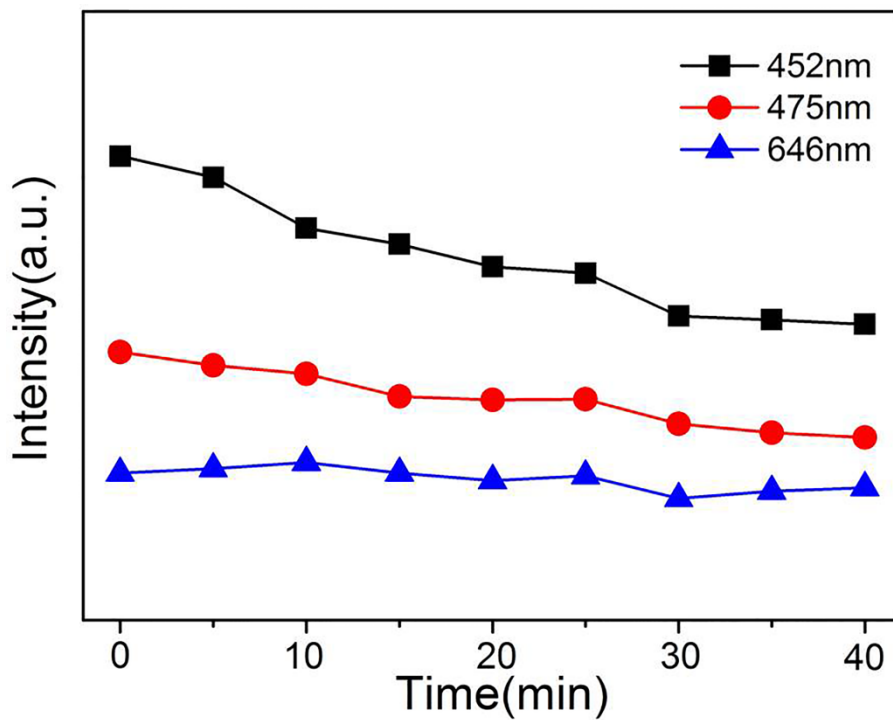

Fig. S2 Upconversion emission intensity as a function of time for a composite containing 1 wt% NaYF<sub>4</sub>:20%Yb, 1%Tm nanoparticles under continuous excitation by a 980nm laser diode (530 mW).

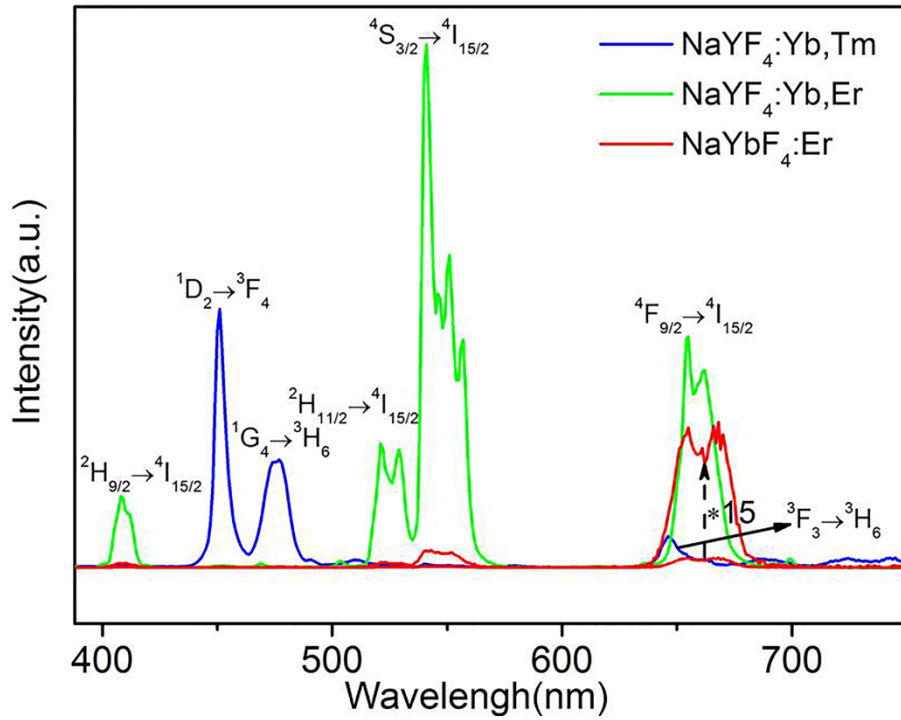

Fig. S3 Upconversion emission spectra of composites containing 1 wt% NaYbF<sub>4</sub>:1%Er (red), NaYF<sub>4</sub>:20%Yb, 1%Er (green) and NaYF<sub>4</sub>:20%Yb, 1%Tm (blue) nanoparticles at same excitation density by a 980 nm laser.
